# Supplementary material for: Use of graphene as protection film in biological environments
Source: PubMed Central journal article supplement — Sci Rep. 2014 Feb 14;4:4097. doi: 10.1038/srep04097 (PMC3924215; doi:10.1038/srep04097), 2014-02-14
Supplement: srep04097-s1.pdf [file srep04097-s1.pdf]

## Supplementary Information

### Graphene: a Protection Film in Biological Environment

Weixia Zhang<sup>1</sup>, Sudarat Lee<sup>1†</sup>, Kelly L. McNear<sup>1</sup>, Ting Fung Chung<sup>2,3</sup>, Seunghyun Lee<sup>4</sup>, Kyunghoon Lee<sup>4</sup>, Scott A. Crist<sup>5,6</sup>, Timothy L. Ratliff<sup>5,6,7</sup>, Zhaohui Zhong<sup>4</sup>, Yong P. Chen<sup>2,3,8</sup>, Chen Yang<sup>1,2,\*</sup>

<sup>1</sup>Department of Chemistry, Purdue University, West Lafayette, Indiana 47907, United States

<sup>2</sup>Department of Physics, Purdue University, West Lafayette, Indiana 47907, United States

<sup>3</sup>Birck Nanotechnology Center, Purdue University, West Lafayette, IN, 47907, United States

<sup>4</sup>Department of Electrical Engineering and Computer Science, University of Michigan, Ann Arbor, Michigan 48109, United States

<sup>5</sup>Department of Comparative Pathobiology, Purdue University, West Lafayette, Indiana 47907, United States

<sup>6</sup>The Center for Cancer Research, Purdue University, West Lafayette, Indiana 47907, United States

<sup>7</sup>College of Veterinary Medicine, Purdue University, West Lafayette, Indiana 47907, United States

<sup>8</sup>School of Electrical and Computer Engineering, Purdue University, West Lafayette, Indiana 47907, United States

<sup>†</sup> Current address: Department of Chemistry, University of Michigan, Ann Arbor, Michigan 48109, United States

\*Corresponding Author: yang@purdue.edu

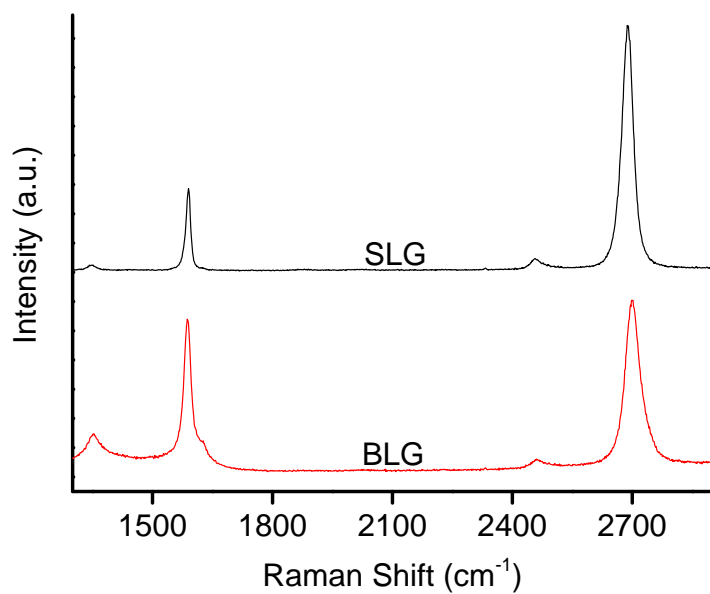

**Figure S1.** Representative Raman spectra taken from CVD grown single-layer graphene (black solid line) and bilayer graphene (red solid line) samples. Raman spectroscopy was performed on graphene transferred on SiO<sub>2</sub>/Si substrates. Laser excitation wavelength is 514 nm.

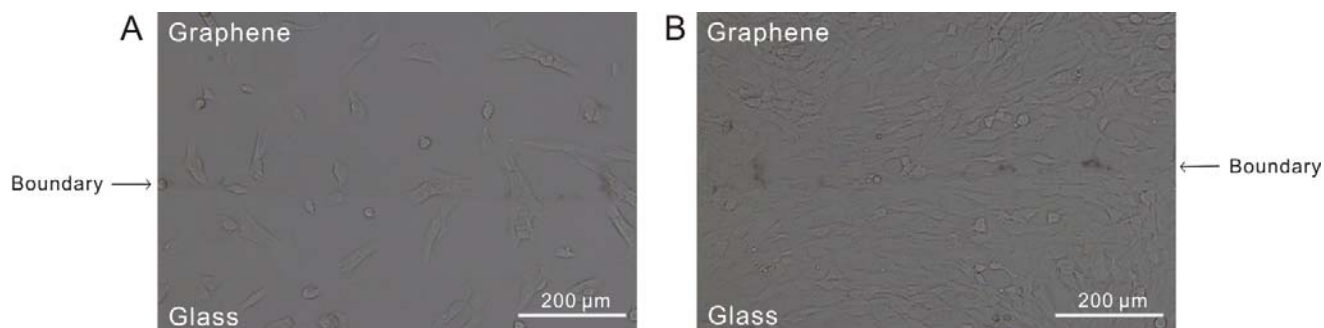

**Figure S2.** Optical images of MG-63 on the boundary area between graphene (top) and glass (bottom) after incubation for (A) 1 day and (B) 3 days.

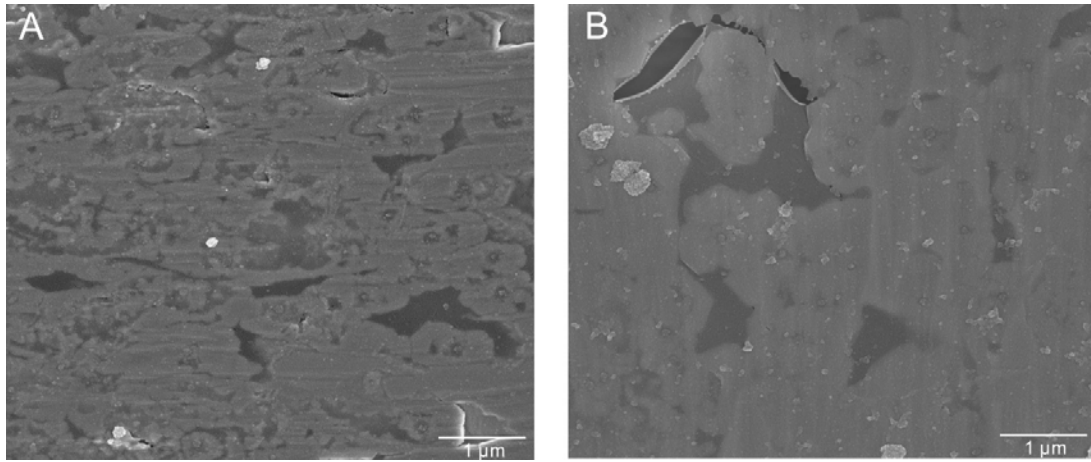

**Figure S3.** SEM images of (A) SLG/Cu and (B) BLG/Cu samples after incubation for 4 days.

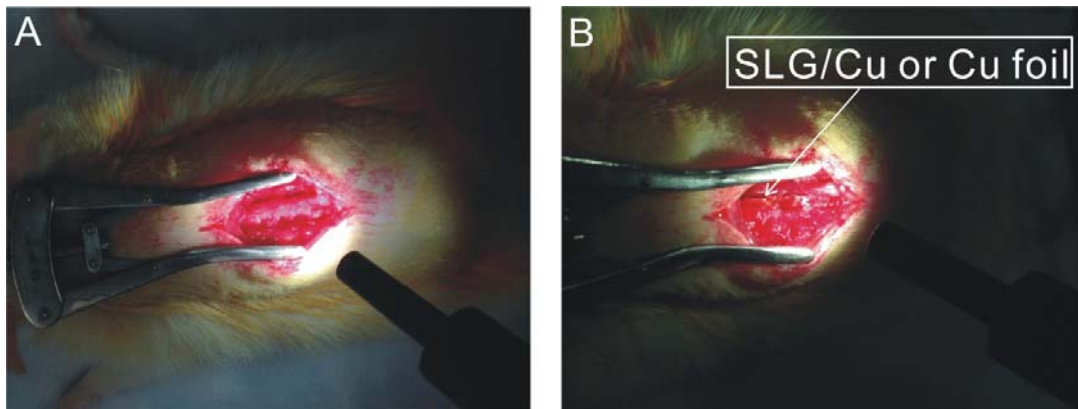

**Figure S4.** Optical images of (A) the exposed spine of a rat, and (B) implanted SLG/Cu or bare Cu foil with size of 1.3 cm x 0.5 cm by the spine on the left.
